# Supplementary material
Source: PubMed Central journal article supplement (PMC2911515)
Supplement: NIHMS214326-supplement-Supp_fig_S1-S5.pdf [file NIHMS214326-supplement-Supp_fig_S1-S5.pdf]

# Supporting Information for “Consistent Refinement of Submitted Models at CASP using a Knowledge-based Potential”

Chopra et al.

**FIGURE S1.** Showing the contribution of magnitude of average structural improvements in  $C\alpha$ RMSD, GDT\_TS and GDT\_HA using our KB01 refinement protocol compared to energy minimization with the KB01 potential and MESH1 stereochemical correction on all models of CASP7. The KB01 refinement protocol (blue line) and energy minimization by KB01 potential (magenta line) are very close to each other for  $C\alpha$ RMSD, GDT\_TS and GDT\_HA over the complete range of modeling difficulties indicating that most of the structural improvements come from using energy minimization on a native-favoring potential surface like KB01. The MESH1 stereochemical correction (green line) has negligible impact on structural improvement.

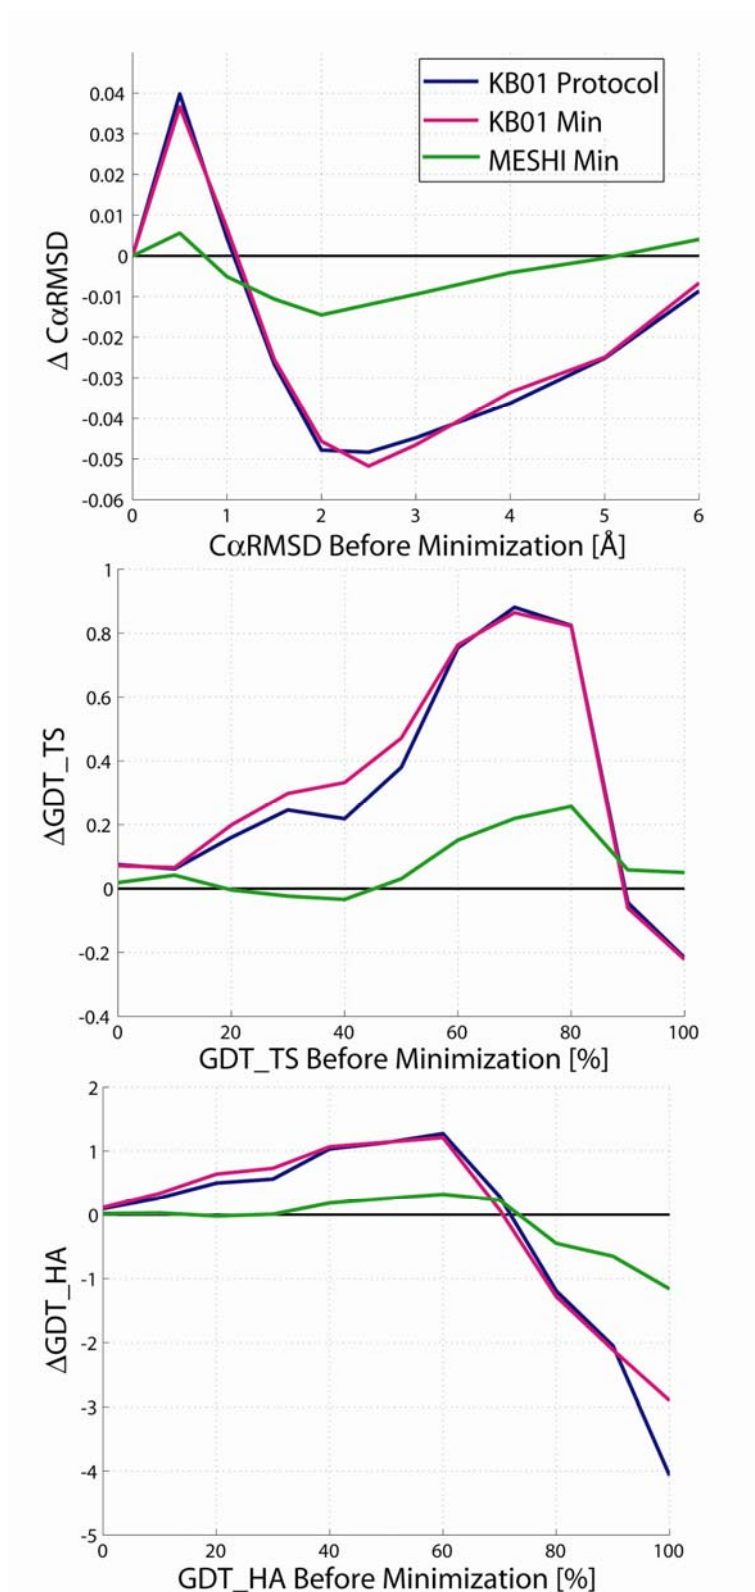

FIGURE S1

**FIGURE S2.** Showing improvement in the high accuracy GDT\_HA scores for (A) all CASP7 groups (B) the Baker group (C) the Zhang Server group and (D) the TASSER group. The maximum average GDT\_HA improvement is around 1% for all CASP7 as well as the Baker models and around 2% for the Zhang Server and TASSER models for the region of interest. The improvement in GDT\_HA by MODELLER is negligible for CASP7 targets of all modeling difficulty, with a change in GDT\_HA close to zero. For the KB01 refinement protocol, there are seven models with more than 4% improvement in GDT\_HA for Baker, six models with more than 6% improvement in GDT\_HA for Zhang Server and three models with more than 10% improvement in GDT\_HA for TASSER.

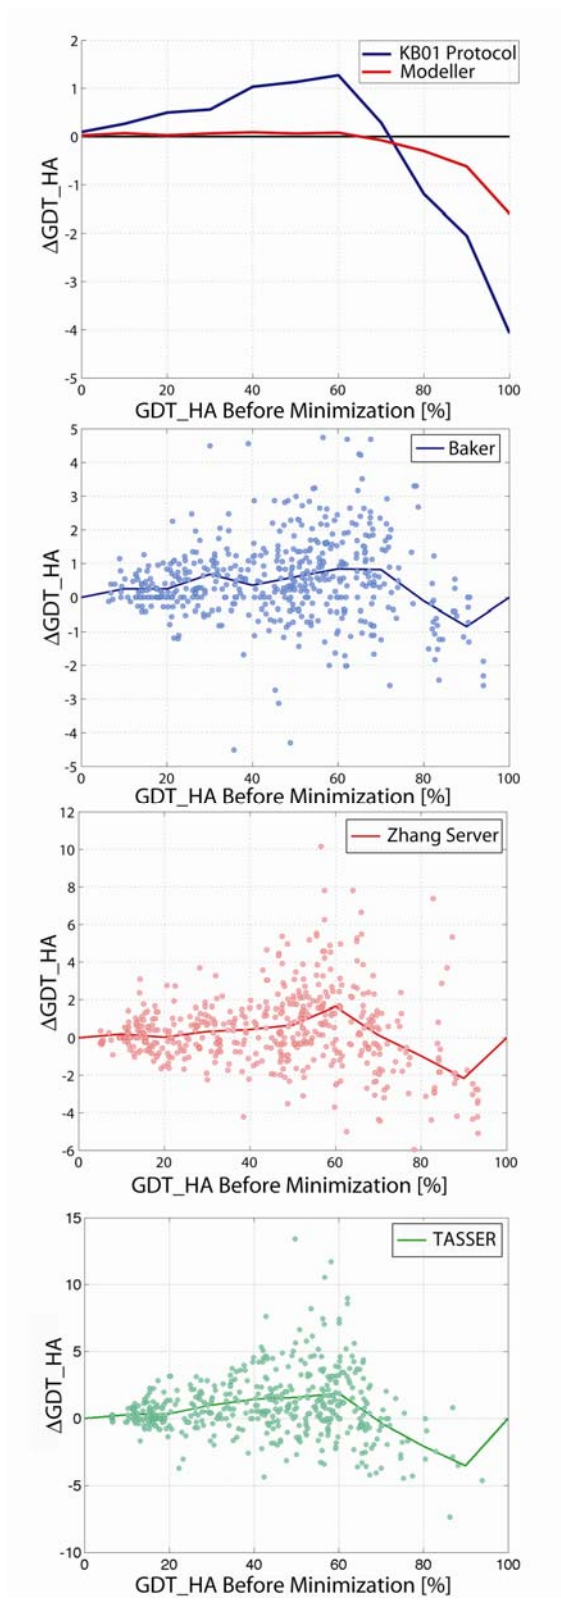

**FIGURE S2**

**FIGURE S3.** Mean weighted  $C^\alpha$  root mean square deviation (wRMS) improvement for near-native decoys (Chopra et al., Proc Natl Acad Sci USA 2008;105: 20239-20244) as a function of the weight of the KB01 term in ENCAD (green curve). Optimal scale values are between 0.1 and 2.0 (magenta dotted lines). A test on all of CASP7 models (blue curve) based on  $\Delta\text{GDT\_TS}$  give the same optimal range for the scale of the KB01 non-bonded energy term in ENCAD.

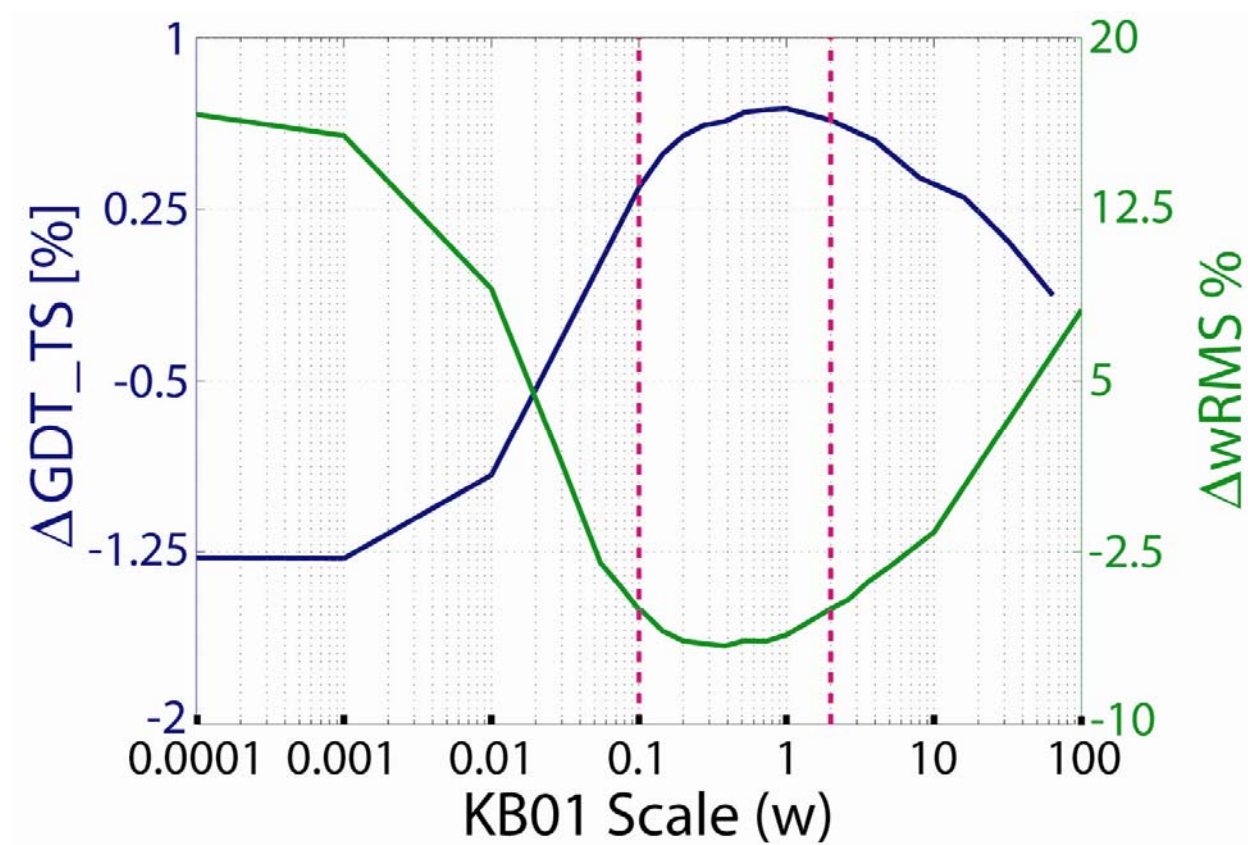

**FIGURE S3**

**FIGURE S4.** Showing the CPU time taken by the KB01 protocol as a function of target chain length. This test used Model 1 from the MetaTASSER group for each of the 114 targets of CASP7 as that group benefits most from the KB01 refinement protocol (Fig. 5). The average time taken to run a model was 106.1 seconds (1.8 minutes). The minimum time is 14 seconds for T0363\_D1 (56 residues) and the maximum time is 817 seconds (13.6 minutes) for T0326 (304 residues). For a given chain length, the CPU time shows wide variation but refinement of a protein with up to 300 residues always takes less than 5 minutes.

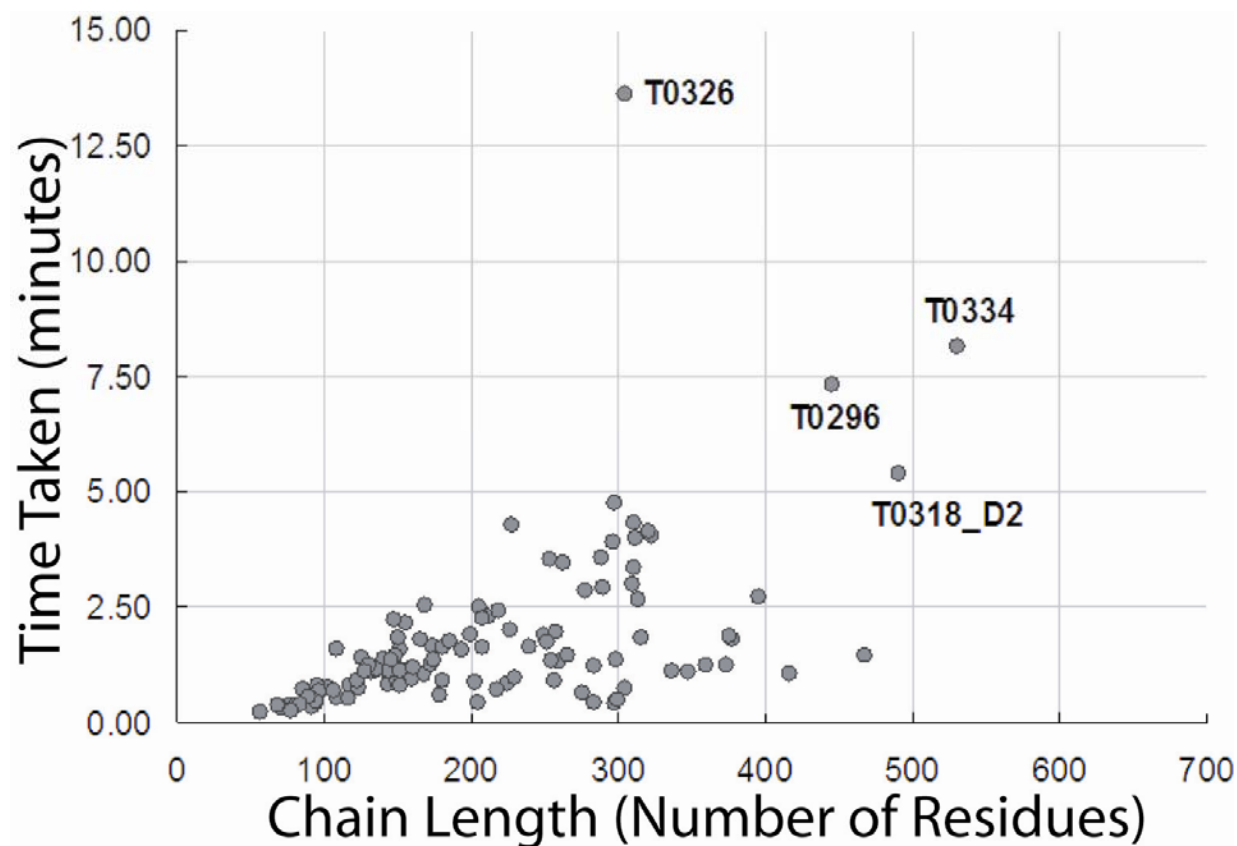

**FIGURE S4**

**FIGURE S5.** Showing how KB01 refinement improves GDT\_TS and GDT\_HA values for residues classified by DSSP as “Helix” (red line), “Sheet” (blue line) and “Coil” (green line). These results are averaged over all models of CASP7. Most improvement in GDT\_TS and GDT\_HA values is for helical residues, with less improvement for coil residues and little improvement for sheet residues. Both helical and coil residues are refined for almost the entire range of modeling difficulty, whereas sheet residues are not refined when the initial GDT\_TS ranges from 20 to 60%. The “All” GDT\_TS and GDT\_HA (grey lines) data are comparable to data in Figures 1(B) and S2. Note that the “All” GDT\_TS and GDT\_HA values are calculated as the weighted mean of “Helix”, “Sheet” and “Coil” GDT\_TS and GDT\_HA values using the overall secondary structure composition for all CASP7 models (36.85% helix, 19.97% sheet and 43.18% coil).

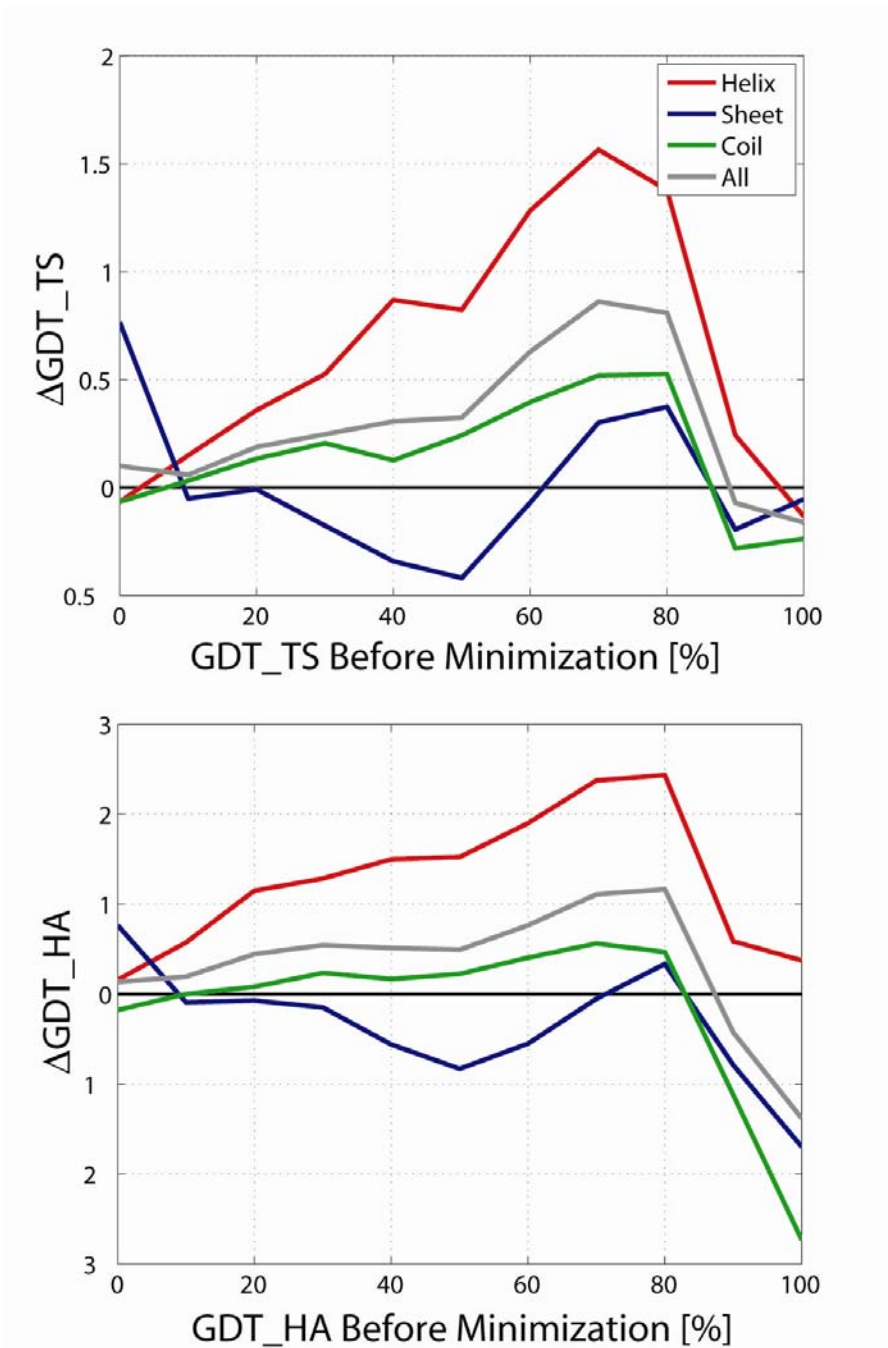

**FIGURE S5**
